# Supplementary material
Source: Springer Nature journal article supplement (https://www.springermedizin.de/resource/supplementary/13045_2013_304_MOESM1_ESM.pdf/9661080)

**A**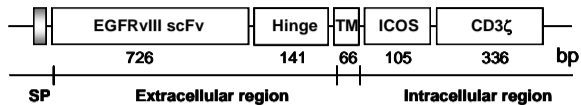**C**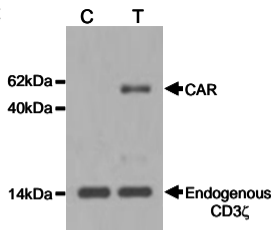**B**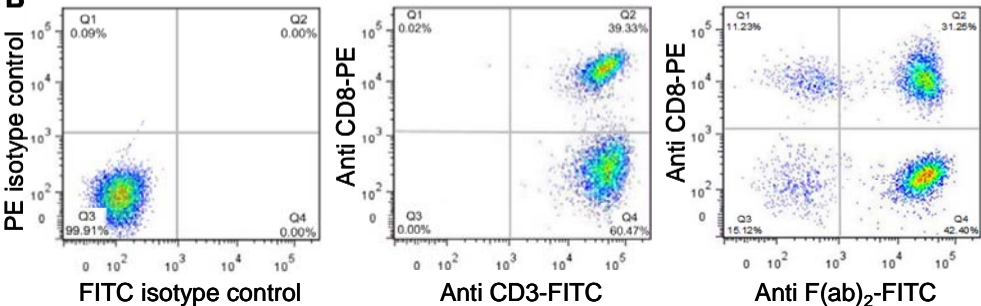

Supplement: MOESM1 [file 9661080]
